# Supplementary material
Source: publisher site journal article supplement (https://www.dovepress.com/get_supplementary_file.php?f=493887.docx)
Supplement: Supplementary file 1 [file get_supplementary_file.php]

**Supplementary materials**

**Pulmonary Tuberculosis Frailty Influencing Factors Questionnaire**

Hello! Here is a questionnaire about the factors influencing the frailty of pulmonary tuberculosis patients. The survey results of this questionnaire are only used for the investigation and are anonymous. Your choice of contents will not affect you. We hope you can take this investigation objectively and seriously, do not have any concerns, carefully read each item, truthfully fill in according to your actual situation, and fill in the most suitable options before the question number (single choice without special explanation). Thank you very much for your support and cooperation!

**I. General conditions**

1. Age:

2. Gender: A: male, B: female

3. Monthly income: A: 1,000 yuan or less, B: 1,000 ~ 3,000 yuan, C: 3,000 yuan or more

4. Education level: A: elementary school or below, B: junior high school, C: senior high school/secondary school, D: college or above

5. Occupation: A: farmer, B: clerk, C: self-employed

6. Marital status: A: married, B: widowed, C: other

7. Source of hospitalization costs: A: self-pay, B: health insurance

8. Place of residence: A: town, B: village

9. BMI:

10. Smoking: A: never, B: quit, C: smoke

11. Alcohol consumption: A: never, B: abstinence, C: alcohol consumption

12. First admission: A: yes, B: no

13. Disease duration (years): A: 0, B: 1-3, C: > 3

14. Types of long-term medication: A: 0, B: 1-3, C: > 3

15. Complications (n): A: 0, B: 1-2, C: ≥ 3

16. Number of reexaminations within one year (times): A: 0-1, B: 2-3, C: > 3

17. Combined with other diseases: A: 0, B: 1-2, C: ≥ 3

**II. Frailty condition**

1. Do you feel healthy?

A: Yes B: No

2. Has your weight recently suddenly and significantly decreased? ("Significant loss"refers to a weight loss of ≥ 6 kg in the last six months or ≥ 3 kg in the last month)

A: Yes B: No

3. Do you have difficulty in daily life due to difficulty walking?

A: Yes B: No

4. Whether you have difficulty in daily life due to difficulty maintaining balance?

A: Yes B: No

5. Whether you have difficulty in daily life due to poor hearing?

A: Yes B: No

6. Whether you have difficulty in daily life due to poor vision?

A: Yes B: No

7. Have you had difficulty in daily living due to weakness in your hands?

A: Yes B: No

8. Do you have difficulty in everyday life due to physical fatigue?

A: Yes B: No

9. Are you having poor memory?

A: Yes B: Sometimes C: No

10. Have you been depressed in the last month?

A: Yes B: Sometimes C: No

11. Have you been nervous or anxious in the last month?

A: Yes B: Sometimes C: No

12. Are you good at dealing with problems?

A: Yes B: No

13. Do you live alone?

A: Yes B: No

14. Do you miss the days of being accompanied by relatives and friends?

A: Yes B: Sometimes C: No

15. Can you get enough support from others

A: Yes B: No

**III. Social support**

1. How many close friends do you have who can be supported and helped? (Choose only one)

A: None B: 1-2 C: 3-5 D: 6 or more

2. In the past year, you: (select only one)

A: Stay away from family and live alone in one room.

B: Residence changes frequently and lives with strangers most of the time.

C: Living with classmates, colleagues or friends.

D: Living with family.

3. You and your neighbors: (Choose only one)

A: Never cares about each other, just nods.

B: May care a little bit if you encounter difficulty.

C: Some neighbors are very concerned about you.

D: Most neighbors care about you.

4. You and colleagues: (Choose only one)

A: Never cares about each other, just nods.

B: May care a little bit if you encounter difficulty.

C: Some colleagues are concerned about you.

D: Most colleagues care about you.

5. Support and care received from the following family members (mark"√"in the appropriate box)

| No. | Family members | A: None | B: Minimal | C: Fair | D: Full Support |
| --- | --- | --- | --- | --- | --- |
| 1 | Couples (lovers) |  |  |  |  |
| 2 | Parent |  |  |  |  |
| 3 | Children |  |  |  |  |
| 4 | Sibling |  |  |  |  |
| 5 | Other members (such as sister-in-law) |  |  |  |  |

6. In the past, the sources of economic support and help to solve practical problems that have been received when you encounter urgent situations are:

(1): No Source (2): Source

The following sources (multiple choice):

A: wife (husband) or lover

B: parent

C: friend

D: colleague

E: direct leadership

F: official or semi-official organizations such as party unions

G: unofficial organizations such as religious and social groups

H: other (please list)

7. In the past, the sources of comfort and concern you have received when you encounter urgent situations are:

(1) No source (2): The following sources (multiple choice):

A: wife (husband) or lover

B: father and mother

C: friend

D: colleague

E: direct leader

F: official or semi-official organizations such as party trade unions

G: unofficial organizations such as religious and social associations

H: others (please list)

8. Do you take the initiative to confide in troubles: (Choose only one)

A: Never confide in anyone

B: Confide in when asked

C: Will take the initiative to confide

Which of the following sources is the most important subject to confide in your troubles? (Check only one)

A: wife (husband) or lover

B: parent

C: friend

D: colleague

E: direct leader

F: official or semi-official organization such as party trade union

G: unofficial organization such as religion and social association

H: other (please list)

9. How to ask for help when you encounter trouble (choose only one):

A: by oneself alone, do not accept help

B: rarely ask others to help

C: sometimes ask others to help

D: often ask family members, relatives and friends, organizations for help when there are difficulties

10. For the organization activities of groups (such as Party organizations, religious organizations, trade unions, student associations, etc.), you: (choose only one item)

A: Never attended B: Occasional C: Frequent D: Active

**IV. Activities of daily living**

| **Item** | **Criteria** | **Score** |
| --- | --- | --- |
| 1. Eating | Needs great help or relies entirely on others | □0 |
|  | Need some help | □5 |
|  | Can eat independently | □10 |
| 2. Bathing | Need assistance during bathing | □0 |
|  | Allow independent bathing once bathing water is ready | □5 |
| 3. Modifications | Need help | □0 |
|  | Can be done independently (washing face, combing hair, brushing teeth, shaving, etc.) | □5 |
| 4. Dressing | Needs great help or relies entirely on others | □0 |
|  | Need some help | □5 |
|  | Can be done independently (dressing and undressing, shoes and socks, fastening buttons, etc.) | □10 |
| 5. Stool control | Completely uncontrolled | □0 |
|  | Occasional loss of control, or need to be prompted | □5 |
|  | Controllable stools | □10 |
| 6. Control urination | Complete loss of control, or indwelling catheter | □0 |
|  | Occasional loss of control, or need to be prompted | □5 |
|  | Controllable urination | □10 |
| 7. Toileting | Needs great help or relies entirely on others | □0 |
|  | Need some help | □5 |
|  | Can be done independently | □10 |
| 8. Bed and chair transfer | Completely dependent on others | □0 |
|  | Needs a lot of help (2 person) and can sit | □5 |
|  | Need some help (1 person) or guidance | □10 |
|  | Can be done independently | □15 |
| 9. Walking on flat ground | Can not move, or moves less than 45 meters | □0 |
|  | Wheelchair alone for more than 45 m, including turning | □5 |
|  | Need 1 person to help walk more than 45 meters (physical or verbal guidance) | □10 |
|  | Walking more than 45 meters without assistance | □15 |
| 10. Ascending and descending stairs | Needs great help or relies entirely on others | □0 |
|  | Need some help (physical strength, verbal coaching, assistive devices) | □5 |
|  | Stairs independently | □10 |
| **Total Score** |  |  |

**V. Depression**

1. Are you basically satisfied with your life?

A: Yes B: No

2. Have you given up a lot of previous activities and hobbies?

A: Yes B: No

3. Do you feel empty?

A: Yes B: No

4. Do you often feel bored?

A: Yes B: No

5. Do you often feel happy?

A: Yes B: No

6. Are you afraid that something bad will happen to you?

A: Yes B: No

7. Do you feel happy most of the time?

A: Yes B: No

8. Do you often feel helpless? (That is, no one can help themselves)

A: Yes B: No

9. Do you prefer to stay at home at night rather than go out and do something new? (For example: having dinner at a newly opened restaurant with your family)

A: Yes B: No

10. Do you think you have more memory problems than most people?

A: Yes B: No

11. Do you think living now is a good thing?

A: Yes B: No

12. Do you feel that you are now useless?

A: Yes B: No

13. Do you feel energetic?

A: Yes B: No

14. Do you feel hopeless about your situation?

A: Yes B: No

15. Do you think most people are in a better situation than themselves?

A: Yes B: No
